# Supplementary material for: Antibody-directed extracellular proximity biotinylation reveals Contactin-1 regulates axo-axonic innervation of axon initial segments
Source: PubMed Central journal article supplement — bioRxiv. 2023 Mar 6:2023.03.06.531378. Preprint. [Version 1] doi: 10.1101/2023.03.06.531378 (PMC10028829; doi:10.1101/2023.03.06.531378), 2023-03-06
Supplement: media-1.pdf [file media-1.pdf]

## MATERIALS AND REAGENTS

Reagents, antibodies, and plasmids used in this study are summarized below:

| REAGENT or RESOURCE              | SOURCE                        | IDENTIFIER                          |
|----------------------------------|-------------------------------|-------------------------------------|
| <b>Antibodies</b>                |                               |                                     |
| Mouse anti-AnkG (IgG2a)          | NeuroMab                      | Cat# 75-146; RRID:<br>AB_10673030   |
| Mouse anti-Gephyrin (IgG1)       | Synaptic Systems              | Cat# 147011; RRID:<br>AB_887717     |
| Guinea pig anti-VGAT             | Synaptic Systems              | Cat# 131004; RRID:<br>AB_887873     |
| Rabbit monoclonal anti-HA        | Cell Signaling Technology     | Cat# 3724; RRID:<br>AB_1549585      |
| Mouse anti-Myc                   | MBL International Corporation | Cat# M192<br>PRID: AB_11160947      |
| Mouse anti-PSD95                 | Antibodies Incorporated       | Cat# 75-028<br>PRID: AB_2292909     |
| Mouse anti-Tenascin-R            | R&D Systems                   | Cat# MAB1624<br>RRID: AB_2207001    |
| Mouse anti-Tuj1                  | BioLegend                     | Cat# 801202<br>RRID: AB_10063408    |
| Mouse anti-V5                    | Invitrogen                    | Cat# R960CUS<br>RRID: AB_159298     |
| Rabbit anti- $\beta$ IV-Spectrin | Rasband lab                   | RRID: AB_2315634                    |
| Rabbit anti-Kv1.2                | Gift of Dr. James Trimmer     | PRID: 2756300                       |
| Rabbit anti-NrCAM                | Abcam                         | Cat# ab24344<br>RRID: AB_448024     |
| Chicken anti-MAP2                | Encor                         | Cat# CPCA-MAP2                      |
| Chicken anti-Neurofascin         | R&D Systems                   | Cat# AF3235<br>RRID: AB_10890736    |
| Goat anti-Cntn1                  | R&D Systems                   | Cat# AF904<br>RRID: AB_2292070      |
| Rat anti-HA                      | Millipore Sigma               | Cat# 11867423001<br>RRID: AB_390918 |

|                                                             |                             |                                      |
|-------------------------------------------------------------|-----------------------------|--------------------------------------|
| HRP-conjugated goat anti-chicken IgY                        | Aves Labs                   | Cat# H-1004<br>RRID: AB_2313517      |
| HRP-conjugated goat anti-rabbit IgG                         | Jackson ImmunoResearch Labs | Cat# 111-035-003<br>PRID: AB_2313567 |
| Alexa Fluor 594 conjugated streptavidin                     | Thermo Fisher Scientific    | Cat# S11227                          |
| Aminomethylcoumarin (AMCA) conjugated goat anti-chicken IgY | Jackson ImmunoResearch Labs | Cat# 103-155-155<br>RRID: AB_2337385 |
| Aminomethylcoumarin (AMCA) conjugated goat anti-rat IgG     | Thermo Fisher Scientific    | Cat# A21093<br>PRID: AB_2535748      |
| Alexa Fluor 488 conjugated goat anti-chicken IgY            | Jackson ImmunoResearch Labs | Cat# 103-545-155<br>RRID: AB_2337390 |
| Alexa Fluor 488 conjugated goat anti-mouse IgG              | Thermo Fisher Scientific    | Cat# A11029<br>RRID: AB_2534088      |
| Alexa Fluor 488 conjugated goat anti-rabbit IgG             | Thermo Fisher Scientific    | Cat# A11034<br>RRID: AB_2758380      |
| Alexa Fluor Plus 594 conjugated goat anti-mouse IgG         | Thermo Fisher Scientific    | Cat# A32742<br>RRID: AB_2762825      |
| Alexa Fluor 594 conjugated donkey anti-goat IgG             | Thermo Fisher Scientific    | Cat# A11058<br>RRID: AB_2758385      |
| Alexa Fluor 488 conjugated goat anti-rat                    | Thermo Fisher Scientific    | Cat# A-11006; RRID:<br>AB_2534074    |
| Alexa Fluor Plus 555 conjugated goat anti-rabbit            | Thermo Fisher Scientific    | Cat# A32732; RRID:<br>AB_2633281     |
| Alexa Fluor 647 conjugated goat anti-rabbit                 | Thermo Fisher Scientific    | Cat# A-21244; RRID:<br>AB_2535812    |
| Alexa Fluor 555 conjugated goat anti-guinea pig             | Thermo Fisher Scientific    | Cat# A-21435; RRID:<br>AB_2535856    |
| Alexa Fluor 647 conjugated goat anti-guinea pig             | Thermo Fisher Scientific    | Cat# A-21450; RRID:<br>AB_2735091    |
| Alexa Fluor 647 conjugated goat anti-mouse IgG1             | Thermo Fisher Scientific    | Cat# A-21240; RRID:<br>AB_2535809    |
| Alexa Fluor 488 conjugated goat anti-mouse IgG2a            | Thermo Fisher Scientific    | Cat# A-21131; RRID:<br>AB_2535771    |
| <b>Bacterial and Virus Strains</b>                          |                             |                                      |
| Stellar competent cells                                     | Takara                      | Cat# 636763                          |

|                                                      |                          |                                |
|------------------------------------------------------|--------------------------|--------------------------------|
| NEB® Stable Competent E. coli (High Efficiency)      | New England Biolabs      | Cat# C3040H                    |
| NEB® 5-alpha Competent E. coli (High Efficiency)     | New England Biolabs      | Cat# C2987H                    |
| AAV PHP.S encapsulated vectors                       | This paper               | N/A                            |
| AAV PHP.eB encapsulated vectors                      | This paper               | N/A                            |
| <b>Chemicals, Peptides, and Recombinant Proteins</b> |                          |                                |
| Biotin tyramide                                      | Perkin Elmer             | Cat# NEL749A001KT              |
| Neurobasal Medium                                    | Gibco                    | Cat# 21103-049                 |
| B-27 supplement                                      | Gibco                    | Cat# 17504-044                 |
| GlutaMax-I                                           | Gibco                    | Cat# 35050-061                 |
| Penicillin-Streptomycin                              | Gibco                    | Cat# 15140122                  |
| DMEM, high glucose, no glutamine                     | Gibco                    | Cat# 11960-044                 |
| Fetal bovine serum                                   | Cytiva                   | Cat# SH30109.03                |
| 0.5% Trypsin-EDTA                                    | Gibco                    | Cat# 15400054                  |
| 2.5% trypsin                                         | Gibco                    | Cat# 15090046                  |
| Hank's buffered salt solution (HBSS)                 | Gibco                    | Cat# 14175-095                 |
| Poly-D-lysine                                        | Gibco                    | Cat# A3890401                  |
| Poly-L-lysine                                        | Sigma                    | Cat# P4832-50ML                |
| Laminin                                              | Gibco                    | Cat# 23017015                  |
| Phosphate buffer saline (PBS)                        | Corning                  | Cat# 21-031-CV                 |
| Opti-MEM                                             | Thermo Fisher Scientific | Cat# 31985070                  |
| Hoechst 33258                                        | Thermo Fisher Scientific | Cat# H3569<br>RRID: AB_2651133 |
| Polyethylenimine (PEI)                               | Polysciences             | Cat# 24765-1                   |
| Normal goat serum                                    | Gibco                    | Cat# 16210-072                 |
| Gelatin from bovine skin                             | Sigma                    | G9382-100G                     |
| FastGreen                                            | Sigma                    | Cat# F7258                     |
| Streptavidin Mag Sepharose                           | GE Healthcare            | Cat# 28-9857-38                |
| Vectashield plus anti-fade mounting media            | Vector labs              | Cat# H-1900                    |
| Sequencing Grade Trypsin                             | Promega                  | V5111                          |
| Tamoxifen                                            | Sigma-Aldrich            | Cat# T5648; CAS:<br>10540-29-1 |
| Fluoromount-G                                        | Southern Biotech         | 0100-01                        |
| <b>Critical Commercial Assays</b>                    |                          |                                |
| Q5 High-Fidelity DNA Polymerase                      | New England Biolabs      | Cat# M0491S                    |

|                                                               |                                                                 |                                             |
|---------------------------------------------------------------|-----------------------------------------------------------------|---------------------------------------------|
| CloneAmp HiFi PCR Premix                                      | Takara                                                          | Cat# 639298                                 |
| NucleoSpin Plasmid Transfection-grade                         | Takara                                                          | Cat# 740490.250                             |
| In-Fusion Snap Assembly Master Mix                            | Takara                                                          | Cat# 638947                                 |
| Gel purification                                              | Cytiva                                                          | 28903470                                    |
| Amicon Ultra-15 Centrifugal Filter Unit 100 kDa               | Millipore                                                       | Cat# UFC910008                              |
| C18 ZipTips                                                   | Millipore                                                       | Cat# ZTC18S096                              |
| BamHI restriction enzyme                                      | New England Biolabs                                             | Cat# R3136T                                 |
| EcoRI restriction enzyme                                      | New England Biolabs                                             | Cat# R3101T                                 |
| NotI restriction enzyme                                       | New England Biolabs                                             | Cat# R3189L                                 |
| XhoI restriction enzyme                                       | New England Biolabs                                             | Cat# R0146M                                 |
| <b>Experimental models: Cell Lines</b>                        |                                                                 |                                             |
| HEK293T cells                                                 | Provided from Baylor College of Medicine Neuroconnectivity Core | N/A                                         |
| <b>Experimental models: Organisms/ Strains</b>                |                                                                 |                                             |
| Rat: Sprague-Dawley rat embryos                               | Charles River Laboratories                                      | SAS-SD                                      |
| Mouse: C57BL/6                                                | Baylor College of Medicine Center for Comparative Medicine      | N/A                                         |
| Mouse: CFW (Swiss Webster)                                    | Charles River                                                   | Cat# CRL:24; RRID: IMSR_CRL:24              |
| Mouse: Nkx2-1 <sup>tm1.1(Cre/ERT2)Zjh/J</sup>                 | Gift from Z.J. Huang; (Taniguchi et al., 2013)                  | JAX: 014552; RRID: IMSR_JAX:014552          |
| Mouse: B6;129S6-Gt(Rosa)26Sortm9(CAG-tdTomato)Hze/J           | Gift from Z.J. Huang; (Taniguchi et al., 2013)                  | JAX: 007905; RRID: IMSR_JAX:007905          |
| Mouse: Igs2tm1.1(CAG-cas9*)Mmw/J (also known as H11Cas9 mice) | The Jackson Laboratory                                          | Cat# JAX: 027650<br>RRID: IMSR_JAX:027650   |
| Mouse: Cntn1 knockout                                         | Boyle et al., 2001                                              | Cat# JAX: q034216,<br>RRID: IMSR_JAX:034216 |
| Mouse: ICR                                                    | Baylor College of Medicine Center for Comparative Medicine      | N/A                                         |

| Oligonucleotides    |                      |  |
|---------------------|----------------------|--|
| Target for knock-in | Sequence (5'->3')    |  |
| rat Adgr1 #1        | TTGAGGGGCCAGGGCCCGAT |  |
| rat Adgr1 #2        | GTTGGTCACTAGTCTCTGAG |  |
| rat Cacna2d1 #1     | ATACTCCTTTGGCTGGTATC |  |
| rat Cacna2d1 #2     | CTGGCAGCAGACTATCTA   |  |
| rat Celsr2 #1       | CGCCGGCCAGGGTTAATGC  |  |
| rat Celsr2 #2       | ATCGCCATGAGCATCAAGGC |  |
| rat Cntn1 #1        | GGTGTGTCCACGCTGTCATC |  |
| rat Cntn1 #2        | GAGGAGACCCGATGACAGCG |  |
| rat Dcc #1          | GTTTGGCAATGCATGTCAA  |  |
| rat Dcc #2          | AAGCAACTCAATGCCATCAC |  |
| rat Fat3 #1         | CTACGGGTGTCCTCTACACC |  |
| rat Fat3 #2         | GGAAACGCAGCACCAGACCC |  |
| rat Kctd12 #1       | ACACCGAGTACGCTTCTGC  |  |
| rat Kctd12 #2       | CTCCCTGCAGAAGACGTACT |  |
| rat L1Cam #1        | GCAGTAGCCCTAGAATAGCA |  |
| rat L1Cam #2        | GACTGGACCTTGCTATTCTA |  |
| rat Lrp1 #1         | ATAGGGGATCCCTTAGCATA |  |
| rat Lrp1 #2         | TGGGGCAGGGCCCTATGCTA |  |
| rat Lrrc4b #1       | GCTCTCAAGAGCGGCTCCA  |  |
| rat Lrrc4b #2       | GAGCCGCTCTTGAAGAGCAG |  |
| rat Ncam1_v1,2,5 #1 | GGGACCGTCTTGACTTCAGT |  |
| rat Ncam1_v1,2,5 #2 | CTCATTCTTTTCGTTTGTG  |  |
| rat Ncam1_v3,4 #1   | AGGGTGGCTGGGATGGCCGT |  |
| rat Ncam1_v3,4 #2   | CAATGAGACCAAGGTGTAGG |  |
| rat Neo1 #1         | AGGTCATCAAGCCGTTGTGA |  |
| rat Neo1 #2         | GGACCTAAATGCCATCACAA |  |
| rat Nfasc #1        | AGTCAATGCCATCTATTCCC |  |
| rat Nfasc #2        | CCATCTATTCCCTGGCCTGA |  |
| rat Nlgn3 #1        | ATAGAGCTATACACGGGTAG |  |
| rat Nlgn3 #2        | TCTGGGATAGAGCTATACAC |  |
| rat NrCAM #1        | AAGGAGTTCATTGCGTTGAC |  |
| rat NrCAM #2        | GAGCTTAAAGACTTAAACAA |  |

|                                              |                               |                             |                             |
|----------------------------------------------|-------------------------------|-----------------------------|-----------------------------|
| rat Nrnx1 #1                                 | GTCCAATGGGGCTGTGGTCA          |                             |                             |
| rat Nrnx1 #2                                 | CTCCTTGACCACAGCCCAT           |                             |                             |
| rat Plxna2 #1                                | GCAACGACTGGCCTACAAGG          |                             |                             |
| rat Plxna2 #2                                | CATGTCCATAGAGAGCTGAA          |                             |                             |
| rat Plxna4 #1                                | CACACTGGTCATCATGGTCC          |                             |                             |
| rat Plxna4 #2                                | TCAGCTGTCTAAGCTCATGA          |                             |                             |
| rat Plxnb2 #1                                | AACCTTATTCTCGAGCGCAG          |                             |                             |
| rat Plxnb2 #2                                | TGCCGCTGCGCTCGAGAATA          |                             |                             |
| rat Ptprs #1                                 | CCAGGTATTCCAACGCCGCC          |                             |                             |
| rat Ptprs #2                                 | GTTCTGCTCCAGGCGGCGT           |                             |                             |
| rat Tenm4 #1                                 | GACAGAGCGAGATGGGCCGA          |                             |                             |
| rat Tenm4 #2                                 | TTCATGAGACAGAGCGAGAT          |                             |                             |
| rat Cntn2 #1                                 | GGAGAACGCAGGTCCGGGAT          |                             |                             |
| rat Cntn2 #2                                 | ATGGTGATATTGATGCTCGC          |                             |                             |
| mouse Cntn1 #1                               | GAGGAGACTCGAAGACAGCG          |                             |                             |
| mouse Cntn1 #2                               | CCTTGCTTTCTGTCTACT            |                             |                             |
| mouse Cntn1 #3                               | CGAGTAGACAAGAAAGCCAA          |                             |                             |
| <b>Target for knock-out</b>                  | <b>Sequence (5'-&gt;3')</b>   | <b>Sequence (5'-&gt;3')</b> | <b>Sequence (5'-&gt;3')</b> |
| Control                                      | CTGTCTTCATCATGGCCGAC          | GTTTCGCATTATCCGAACCAT       | TAAGCGTCGCAAGAAGACGG        |
| Nfasc                                        | ACGATCTCGGTGAGAGTAAA          | CATGTCCTGCAGCATGACGT        | ACTGCGGAAGTCGATCACCA        |
| Cntn1                                        | GCATAGCAGAAAACGCGTAT          | CTACGTGATTGACTTTAACA        | TCGGATGAGCAGTCCCCAT         |
| NrCAM                                        | ATGTGTTCCGTTACGAGTCC          | GCCGGTGGTAATCCAATTGG        | GGATTACAATATTCTCCCGT        |
| <b>Recombinant DNA plasmids</b>              |                               |                             |                             |
| PX551 (AAV-SpCas9)                           | Gift of Dr. Feng Zhang        |                             | Addgene #60957              |
| PX552 (pAAV-U6sgRNA(SapI)_hSyn-GFP-KASH-bGH) | Gift of Dr. Feng Zhang        |                             | Addgene #60958              |
| pCAG-1BP-NLS-Cas9-1BP-NLS                    | Gift of Dr. Juan Belmonte     |                             | Addgene #87108              |
| pCAG_smFP HA                                 | Gift of Dr. Loren Looger      |                             | Addgene #59759              |
| pCAG_smFP V5                                 | Gift of Dr. Loren Looger      |                             | Addgene #59758              |
| pMJ114                                       | Gift of Dr. Jonathan Weissman |                             | Addgene #85995              |
| pMJ117                                       | Gift of Dr. Jonathan Weissman |                             | Addgene #85997              |
| pMJ179                                       | Gift of Dr. Jonathan Weissman |                             | Addgene #85996              |
| pUCmini-iCAP-PHP.S                           | Gift of Dr. Viviana Gradinaru |                             | Addgene #103002             |
| pUCmini-iCAP-PHP.eB                          | Gift of Dr. Viviana Gradinaru |                             | Addgene #103005             |

|                                           |                            |                                                                                                                                                                                                                    |
|-------------------------------------------|----------------------------|--------------------------------------------------------------------------------------------------------------------------------------------------------------------------------------------------------------------|
| pHelper                                   | Agilent Technologies       | Cat #240071                                                                                                                                                                                                        |
| Knock-in sgRNA and donor plasmid          | This paper                 | N/A                                                                                                                                                                                                                |
| pAAV-3x-gRNA-smFP                         | This paper                 | N/A                                                                                                                                                                                                                |
| rat contactin-myc                         | Gift of Dr. Elior Peles    | N/A                                                                                                                                                                                                                |
| pAAV-hSyn-EGFP                            | Gift of Dr. Bryan Roth     | Addgene # 5046                                                                                                                                                                                                     |
| pcDNA3                                    | Invitrogen                 | N/A                                                                                                                                                                                                                |
| hSYNp-Cntn1-Myc full-length               | This paper                 | N/A                                                                                                                                                                                                                |
| hSYNp-Cntn1-Myc truncates                 | This paper                 | N/A                                                                                                                                                                                                                |
| <b>Software and Algorithms</b>            |                            |                                                                                                                                                                                                                    |
| Fiji                                      | NIH                        | <a href="https://fiji.sc/">https://fiji.sc/</a>                                                                                                                                                                    |
| Zeiss Zen (Blue Edition) Imaging Software | Zeiss                      | <a href="http://www.zeiss.com/microscopy/en_us/products/microscope-software/zen.html#introduction">http://www.zeiss.com/microscopy/en_us/products/microscope-software/zen.html#introduction</a> ; RRID: SCR_013672 |
| NIS Elements Imaging Software             | Nikon                      | <a href="https://www.microscope.healthcare.nikon.com/products/software/nis-elements">https://www.microscope.healthcare.nikon.com/products/software/nis-elements</a>                                                |
| CRISPOR                                   | Haeussler et al., 2016     | <a href="http://crispor.tefor.net/crispor.py">http://crispor.tefor.net/crispor.py</a>                                                                                                                              |
| Adobe Photoshop (version 23.5.1)          | Adobe                      | <a href="https://www.adobe.com/products/photoshop.html">https://www.adobe.com/products/photoshop.html</a>                                                                                                          |
| Adobe Illustrator (version 26.5)          | Adobe                      | <a href="https://www.adobe.com/products/illustrator.html">https://www.adobe.com/products/illustrator.html</a>                                                                                                      |
| GraphPad Prism 9                          | GraphPad                   | <a href="https://www.graphpad.com/">https://www.graphpad.com/</a>                                                                                                                                                  |
| MATLAB                                    | Mathworks                  | <a href="https://www.mathworks.com/products/matlab.html">https://www.mathworks.com/products/matlab.html</a>                                                                                                        |
| Python                                    | Python Software Foundation | <a href="https://www.python.org/">https://www.python.org/</a>                                                                                                                                                      |

|                                                   |                   |                                                                                                                       |
|---------------------------------------------------|-------------------|-----------------------------------------------------------------------------------------------------------------------|
| Script for calculation of extracellular tyrosines | Rasband lab       | <a href="https://github.com/jrasband/extracellular-tyrosines">https://github.com/jrasband/extracellular-tyrosines</a> |
| BioRender                                         | BioRender         | <a href="https://biorender.com/">https://biorender.com/</a>                                                           |
| <b>Other</b>                                      |                   |                                                                                                                       |
| Axiomager Z2 with Apotome                         | Zeiss             |                                                                                                                       |
| Ni2 upright fluorescence microscope               | Nikon             |                                                                                                                       |
| Microtome HM450                                   | Thermo Scientific |                                                                                                                       |
| Cryostat CryoStar NX70                            | Thermo Scientific |                                                                                                                       |
| QExactive Plus                                    | Thermo Scientific |                                                                                                                       |
| NanoAcquity Ultra Performance UPLC system         | Waters            |                                                                                                                       |
| 15-cm EasySpray C18 column                        | Thermo Scientific |                                                                                                                       |
